# Supplementary material
Source: MDPI journal article supplement (https://www.mdpi.com/2571-6131/5/3/35)
Supplement: s1 [file s1 › ceramics-1840957-supplementary.pdf]

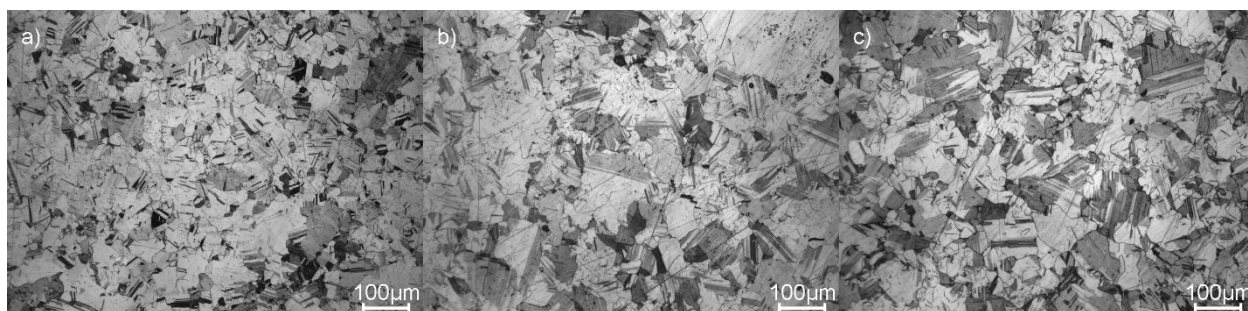

**Figure S1.** Images of the polished and etched surfaces of the original ZnSe samples from different manufacturers: the polycrystalline ZnSe manufactured by INOPTICS, Nizhny Novgorod, Russia (a); the polycrystalline ZnSe manufactured by PromLab LLC, Nizhny Novgorod, Russia (b); the polycrystalline ZnSe manufactured by II-VI Incorporated, Saxonburg, USA (c).
